# Supplementary material
Source: PubMed Central journal article supplement (PMC4253837)
Supplement: supp_btu756_SplitMEM-Supplement.v3.pdf [file supp_btu756_SplitMEM-Supplement.v3.pdf]

## 1 SUPPLEMENTARY MATERIAL

### 1.1 Algorithm: from alignments to compressed de Bruijn graph

In this section we present an algorithm that constructs a compressed de Bruijn graph from the set of self-alignments of length  $\geq k$  in the genome. We use *mummer* (Kurtz *et al.*, 2004) to preprocess the genome and efficiently locate all self-alignments in the genome whose lengths are at least  $k$ . Our alignment-based algorithm begins with a graph consisting of one large node to represent the entire genome. Then, the algorithm considers one alignment at a time. As each alignment is incorporated into the graph, the nodes are split to represent smaller subsequences of the genome. Occasionally, nodes are merged when a repetition is detected in the genome. Thus our algorithm achieves a runtime that is related to the number of self-alignments bounded by  $k$ . The number of self-alignments shrinks rapidly as  $k$  grows. In contrast there is no such advantage to using large values of  $k$  in an uncompressed de Bruijn graph because the initial number of nodes is fixed by the genome size.

Algorithm 2 depicts our alignment-based algorithm for constructing the compressed de Bruijn graph that represents a genome. We exclude implementation details that ensure the correctness of the algorithm. Each node captures a distinct subsequence of length  $\geq k$  in the genome. This is stored as a set of start positions and a length. We maintain separately a sorted set of all start positions in the graph, with pointers to the nodes that represent them, so that we can quickly navigate to a start position in the graph and easily query whether there is a node with a particular start position. Each distinct subsequence of length  $\geq k$  in the genome is represented by exactly one node in the compressed de Bruijn graph. Each  $k$ -mer, which we denote by its start position in the genome, is included in exactly one node in the graph. This invariant is true in the final graph as well as during construction. In the final graph, there is one leaf, representing the end of the genome. However, during construction, we allow many nodes to be leaves, representing suffixes of the genome. At the end of construction, each leaf (except possibly the shortest one) has its sequence truncated and becomes a parent to the first node whose sequence begins within the leaf's sequence.

We now summarize the procedure of our algorithm as it processes an alignment. We first insert the starting position of the first interval in the alignment, `alignBeg1`, to the appropriate node and then we add the starting position of the second interval, `alignBeg2`, to the same node. If another node already represents `alignBeg2`, the nodes are merged. Before merging nodes that begin with identical subsequences, we ensure that they represent sequences of the same length and precede a merge by a split (`splitBackwards`) if one node's sequence is a proper prefix of the other's. When a starting position is added to a node, we ensure that the subsequence is removed from any other node that already captured it, splitting nodes as appropriate. Thus we ensure that there are no redundancies in the graph.

When an alignment is considered, there are several scenarios that can occur when we insert `alignBeg1`.

#### 1. `align1.beg` is a starting position of a node in the graph.

- a. **The existing node represents a longer subsequence than the alignment.** In this case, we split the existing node to form a new node whose sequence is a proper prefix of the

existing node's. This uses the `splitBackwards` routine. Then a new start position of `align2.beg` is inserted to the new node [if it was not already there].

- b. **The existing node represents a shorter subsequence than the alignment.** In this case, we insert the beginning of the alignment by inserting a new start position of `align2.beg` to the new node. Then the alignment is trimmed at its left end and we continue by iterating through the rest of the alignment.
  - c. **The existing node represents precisely the first interval of the alignment.** In this case, `align2.beg` is added as a start position for the node.
2. **`align1.beg` is not a starting position of any node in the graph.** In other words, `alignBeg1` is implicitly included within a node.
    - a. **The closest existing node with a start position before `align1.beg` ends at `align1.end`** In this case, we use `splitForwards` to split the closest node with a start position less than `align1.beg` into two nodes. Then `align2.beg` is inserted as a start position to the node that represents a suffix of the original node.
    - b. **The closest existing node with a start position before `align1.beg` extends past `align1.end`** In this case, we use `splitMiddle` to split the closest node with a start position less than `align1.beg`. This creates two new nodes. `align2.beg` is inserted as a start position to the new node that represents the middle of the original node.

As the alignments are considered, nodes in the graph are merged and split. There are three ways in which a node is split, which we call `splitBackwards`, `splitForwards`, and `splitMiddle`. The `splitBackwards` routine is used when an alignment is a prefix to an existing node. It splits the existing node into two nodes. The `splitForwards` routine is used when an alignment is implicitly contained within an existing node, is not a prefix, and the alignment is a suffix of the existing node. It splits the existing node into two nodes. The `splitMiddle` routine is used when an alignment is implicitly contained within an existing node, is not a prefix, and the alignment ends earlier in the sequence than the existing node. It splits the existing node into three nodes. The splitting routines are depicted in Figure 1.

Self-overlapping alignments contributed additional complexity to our algorithm. Self-overlapping alignments are tandem repeats in the genome. We break down each self-overlapping alignment into its smallest repeating unit and create a node to capture the tandem repeat with all of its start positions. Then we create a separate node that bridges the occurrences of the tandem repeats, forming a cycle in the graph. We create an edge between these two nodes with multiplicity to represent all recurrences of the tandem repeat.

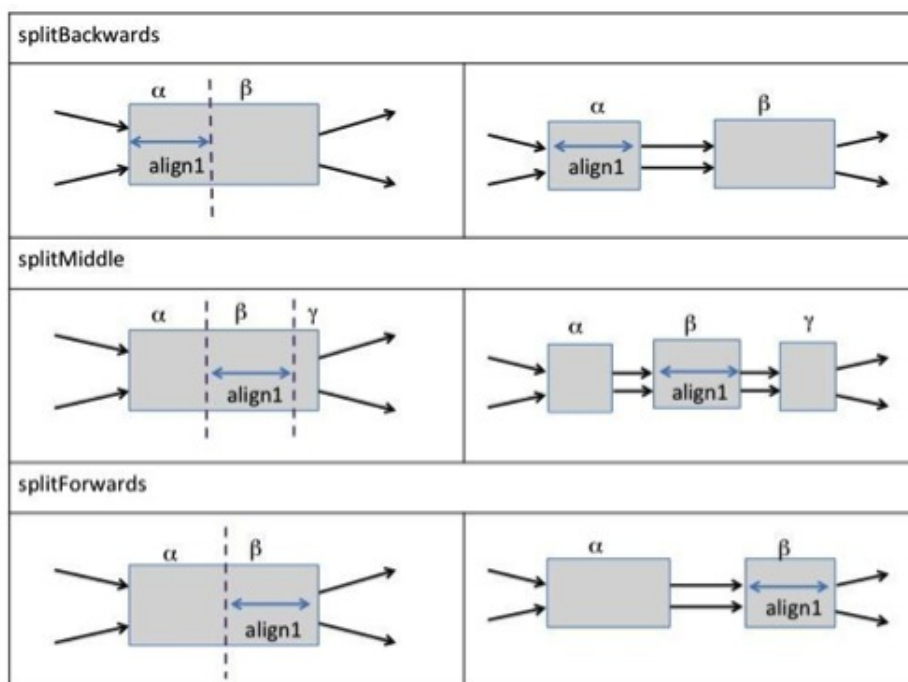

**Fig. 1.** The three splitting routines in our alignment-based algorithm. *splitBackwards* splits a node representing  $\alpha\beta$  into separate nodes for  $\alpha$  and  $\beta$ . *splitMiddle* splits a node representing  $\alpha\beta\gamma$  into separate nodes for  $\alpha$ ,  $\beta$  and  $\gamma$ . *splitForwards* splits a node representing  $\alpha\beta$  into separate nodes for  $\alpha$  and  $\beta$ . Note that when a node representing the subsequence  $\alpha\beta$  is split into separate nodes for  $\alpha$  and  $\beta$ , the overlapping  $k - 1$  characters occur both at the end of the node for  $\alpha$  and at the beginning of the node for  $\beta$ .

**Algorithm 2** Construct Compressed de Bruijn Graph from AlignmentsInput: genome sequence,  $k$ , set of self-alignments  $\geq k$ .

Output: compressed forward de Bruijn graph of genome.

**for all** lines in mummerOutputFile **do**  **if** splitInterval **then**    splitInterval  $\leftarrow$  false

▷ set align1 and align2 to second part of self-overlap

**else**

▷ load align1 and align2 from input file

**if** self overlapping alignment **then**

▷ split alignment to two parts

▷ set align1 and align2 to first part of self-overlap

      splitInterval  $\leftarrow$  true    **else**      splitInterval  $\leftarrow$  false    **end if**  **end if**  **while** ! intervalInserted **do**

foundPos = findNodeBeginAtPos(align1.beg)

**if** foundPos  $\neq$  -1 **then**      foundNode  $\leftarrow$  nodes[foundPos]      **if** foundNode.length > alignLength **then**

▷ foundNode is too long

splitBackwards(foundNode, alignLength)

        intervalInserted  $\leftarrow$  true      **else if** foundNode.length < alignLength **then**

▷ foundNode is too short

        incToNextBegin  $\leftarrow$  foundNode.length  $-k + 1$ 

align1.beg += incToNextBegin

align2.beg += incToNextBegin

        intervalInserted  $\leftarrow$  false      **else**

▷ first interval is represented by foundNode

        intervalInserted  $\leftarrow$  true      **end if**    **else**

▷ align1.beg not found, implicitly included in a node

      lastNode  $\leftarrow$  closest node with start before align1.beg      **if** align1.end is end of lastNode **then**        foundNode  $\leftarrow$  splitNodeForward(lastNode, align1.beg)      **else**        foundNode  $\leftarrow$  splitNodeMiddle(lastNode, align1.beg, align1.length)      **end if**

▷ foundNode represents align.beg

createChild(newNode, align.beg)

      intervalInserted  $\leftarrow$  true    **end if**    addedStart  $\leftarrow$  addStartPosToNode(foundNode, align2.beg)    **if** intervalInserted and addedStart **then**

createChild(foundNode, align2.beg)

**end if**  **end while****end for**

updateLeaves()

---

**Algorithm 3** Construct Repeat Nodes from MEM nodes in suffix tree in  $O(n \log n)$  time and space

---

```

1: procedure CREATEREPEATNODESFROMSUFFIXTREE ▷ recursive DFS of suffix tree
2:   CREATEREPEATNODESFROMMEM(root)
3: end procedure

4: procedure CREATEREPEATNODESFROMMEM(node)
5:   for all node children do
6:     CREATEREPEATNODESFROMMEM(node.child)
7:   end for
8:   if node.MEM then
9:     if node.parent  $\neq$  root then ▷ include path from root to MEM node
10:      extend node label left to include path label from root
11:    end if
12:    while node.strdepth  $\geq k$  do
13:      LMAnode  $\leftarrow$  node.LMA
14:      if LMAnode  $\neq$  null then ▷ skip LMAnode.strdepth characters
15:        if skippedChars then
16:          createRepeatNode for skipped segment of MEM
17:        end if
18:        numCharsToSkip  $\leftarrow$  LMAnode.strdepth  $- k + 1$ 
19:      end if
20:      node  $\leftarrow$  node.suffixSkips[0]
21:      if numCharsToSkip  $> 0$  then ▷ use suffix skips to traverse numCharsToSkip suffix links quickly
22:        numCharsToSkip  $--$ 
23:        if node.MEM then
24:          break
25:        end if
26:        while numCharsToSkip  $> 0$  do
27:          slinkIndex  $\leftarrow$  floor(log(numCharsToSkip) / log(2))
28:          slinkTraversing  $\leftarrow$  pow(2, slinkIndex)
29:          if node.closestLMA[slinkIndex]  $\neq$  null then
30:            if node.closestLMAproximity[slinkIndex]  $<$  numCharsToSkip then
31:              adjust numCharsToSkip to extend over skipped LMA
32:            end if
33:          end if
34:          node  $\leftarrow$  node.suffixSkips[slinkIndex]
35:          numCharsToSkip  $- =$  slinkTraversing
36:        end while
37:      end if
38:    end while
39:    if needLastNode then
40:      createRepeatNode for overhang beyond last embedded MEM
41:    end if
42:  end if
43: end procedure

```

---

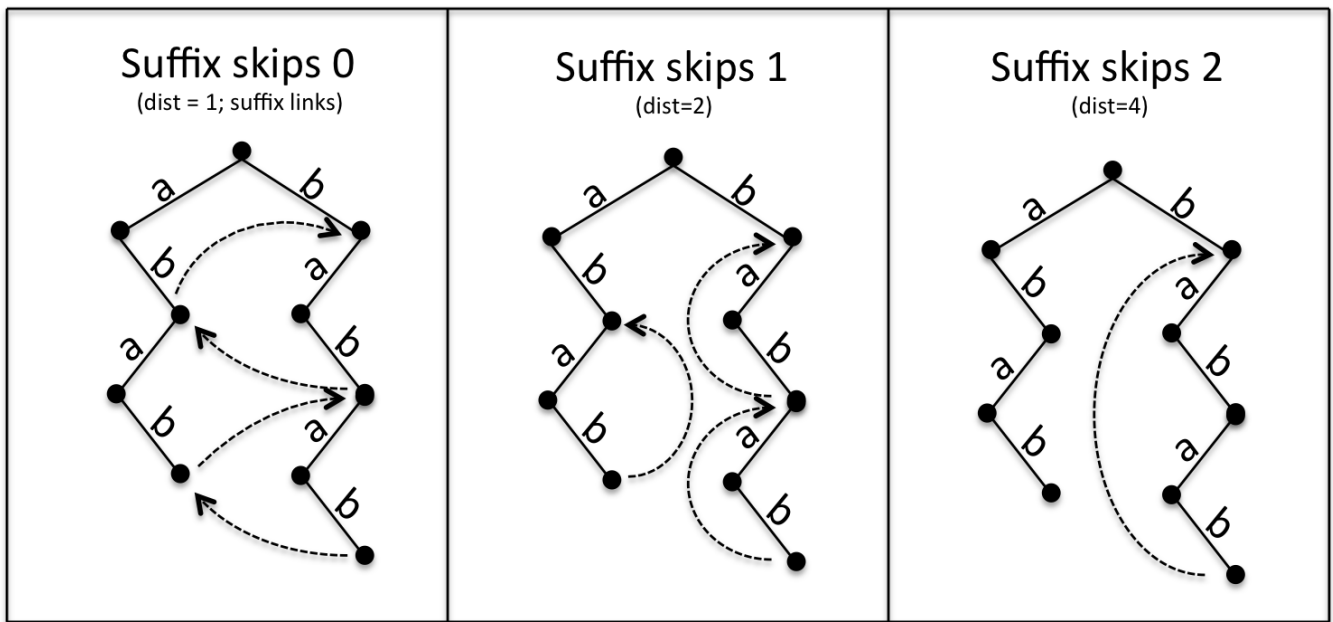

**Fig. 2.** Example suffix tree and suffix skips for the string "babab\$". For clarity, only a subset of the suffix links and skips are displayed. Leaf nodes with \$ characters are also not shown.

**Table 1.** The 9 *B. anthracis* and 9 *E. coli* strains included in our pan-genome analysis.

| Strain                                   | Size    | Accession |
|------------------------------------------|---------|-----------|
| <i>B. anthracis</i> A0248 uid33543       | 5178 KB | CP001598  |
| <i>B. anthracis</i> A16R uid40353        | 5179 KB | CP001974  |
| <i>B. anthracis</i> A16 uid40303         | 5179 KB | CP001970  |
| <i>B. anthracis</i> Ames 0581 uid10784   | 5178 KB | AE017334  |
| <i>B. anthracis</i> Ames uid309          | 5178 KB | AE016879  |
| <i>B. anthracis</i> CDC 684 uid31329     | 5181 KB | CP001215  |
| <i>B. anthracis</i> CI uid36309          | 5147 KB | CP001746  |
| <i>B. anthracis</i> H9401 uid49361       | 5170 KB | CP002091  |
| <i>B. anthracis</i> str Sterne uid10878  | 5180 KB | AE017225  |
| <i>E. coli</i> 0127 H6 E2348 69 uid32571 | 4919 KB | FM180568  |
| <i>E. coli</i> 042 uid40647              | 5193 KB | FN554766  |
| <i>E. coli</i> 536 uid16235              | 4893 KB | CP000247  |
| <i>E. coli</i> 55989 uid33413            | 5107 KB | CU928145  |
| <i>E. coli</i> ABU 83972 uid38725        | 5083 KB | CP001671  |
| <i>E. coli</i> APEC O1 uid16718          | 5034 KB | CP000468  |
| <i>E. coli</i> APEC O78 uid184588        | 4753 KB | CP004009  |
| <i>E. coli</i> BL21 DE3 uid20713         | 4516 KB | CP001509  |
| <i>E. coli</i> BL21 DE3 uid28965         | 4516 KB | AM946981  |

**Table 2.** The number of nodes with `suffixSkip[i]` decreases rapidly. For 9 strains of *B. anthracis*, *k*-mer lengths of 25, 100 and 1000 bp, the longest MEM is 5227319 bp long.

|                     | <i>i</i> | <i>k</i> =25 | <i>k</i> =100 | <i>k</i> =1000 |
|---------------------|----------|--------------|---------------|----------------|
| <i>B. anthracis</i> | 1        | 40151049     | 40151049      | 40151049       |
|                     | 2        | 30974258     | 22527962      | 6987800        |
|                     | 3        | 30974258     | 22527962      | 6987800        |
|                     | 4        | 30974258     | 22527962      | 6987800        |
|                     | 5        | 29713445     | 22527962      | 6987800        |
|                     | 6        | 25692642     | 22527962      | 6987800        |
|                     | 7        | 20529276     | 20529276      | 6987800        |
|                     | 8        | 15101442     | 15101442      | 6987800        |
|                     | 9        | 10308390     | 10308390      | 6987800        |
|                     | 10       | 6895641      | 6895641       | 6895641        |
|                     | 11       | 5234634      | 5234634       | 5234634        |
|                     | 12       | 4697489      | 4697489       | 4697489        |
|                     | 13       | 4567441      | 4567441       | 4567441        |
|                     | 14       | 4523377      | 4523377       | 4523377        |
|                     | 15       | 4461156      | 4461156       | 4461156        |
|                     | 16       | 4362852      | 4362852       | 4362852        |
|                     | 17       | 4166244      | 4166244       | 4166244        |
|                     | 18       | 3863600      | 3863600       | 3863600        |
|                     | 19       | 3339312      | 3339312       | 3339312        |
|                     | 20       | 2290736      | 2290736       | 2290736        |
|                     | 21       | 193584       | 193584        | 193584         |

**Table 3.** The number of nodes with `suffixSkip[i]` decreases rapidly. For 9 strains of *E. coli*, *k*-mer lengths of 25, 100 and 1000 bp, the longest MEM is 2235388 bp long.

|                | <i>i</i> | <i>k</i> =25 | <i>k</i> =100 | <i>k</i> =1000 |
|----------------|----------|--------------|---------------|----------------|
| <i>E. coli</i> | 1        | 43523338     | 43523338      | 43523338       |
|                | 2        | 36840466     | 35286760      | 31589536       |
|                | 3        | 36840466     | 35286760      | 31589536       |
|                | 4        | 36840466     | 35286760      | 31589536       |
|                | 5        | 36584898     | 35286760      | 31589536       |
|                | 6        | 35844384     | 35286760      | 31589536       |
|                | 7        | 34929097     | 34929097      | 31589536       |
|                | 8        | 33880911     | 33880911      | 31589536       |
|                | 9        | 32781069     | 32781069      | 31589536       |
|                | 10       | 31539198     | 31539198      | 31539198       |
|                | 11       | 29765911     | 29765911      | 29765911       |
|                | 12       | 26863423     | 26863423      | 26863423       |
|                | 13       | 22433712     | 22433712      | 22433712       |
|                | 14       | 16980038     | 16980038      | 16980038       |
|                | 15       | 12225376     | 12225376      | 12225376       |
|                | 16       | 9541879      | 9541879       | 9541879        |
|                | 17       | 8103467      | 8103467       | 8103467        |
|                | 18       | 6707025      | 6707025       | 6707025        |
|                | 19       | 5204759      | 5204759       | 5204759        |
|                | 20       | 4178743      | 4178743       | 4178743        |
|                | 21       | 3130167      | 3130167       | 3130167        |
|                | 22       | 5227319      | 5227319       | 5227319        |

**Table 4.** The 62 available strains of *E. coli* included in our scaling experiments. To highlight the maximum similarity between the genomes, seven of the strains were reverse complemented to be in the same orientation as the others.

| Strain                                  | Size    | Accession | Orientation |
|-----------------------------------------|---------|-----------|-------------|
| E. coli 0127 H6 E2348 69 uid32571       | 4919 KB | FM180568  | Forward     |
| E. coli 042 uid40647                    | 5193 KB | FN554766  | Forward     |
| E. coli 536 uid16235                    | 4893 KB | CP000247  | Forward     |
| E. coli 55989 uid33413                  | 5107 KB | CU928145  | Forward     |
| E. coli ABU 83972 uid38725              | 5083 KB | CP001671  | Forward     |
| E. coli APEC O1 uid16718                | 5034 KB | CP000468  | Forward     |
| E. coli APEC O78 uid184588              | 4753 KB | CP004009  | Forward     |
| E. coli BL21 DE3 uid20713               | 4516 KB | CP001509  | Forward     |
| E. coli BL21 DE3 uid28965               | 4516 KB | AM946981  | Forward     |
| E. coli BW2952 uid33775                 | 4535 KB | CP001396  | Forward     |
| E. coli B REL606 uid18281               | 4586 KB | CP000819  | Forward     |
| E. coli CFT073 uid313                   | 5182 KB | AE014075  | Forward     |
| E. coli C ATCC 8739 uid18083            | 4702 KB | CP000946  | Forward     |
| E. coli DH1 uid30031                    | 4587 KB | CP001637  | Reverse     |
| E. coli DH1 uid52077                    | 4578 KB | AP012030  | Forward     |
| E. coli E24377A uid13960                | 4933 KB | CP000800  | Forward     |
| E. coli ED1a uid33409                   | 5161 KB | CU928162  | Forward     |
| E. coli ETEC H10407 uid42749            | 5105 KB | FN649414  | Forward     |
| E. coli HS uid13959                     | 4600 KB | CP000802  | Forward     |
| E. coli IAI1 uid33373                   | 4657 KB | CU928160  | Forward     |
| E. coli IAI39 uid33411                  | 5084 KB | CU928164  | Forward     |
| E. coli IHE3034 uid43693                | 5060 KB | CP001969  | Forward     |
| E. coli JJ1886 uid218163                | 5082 KB | CP006784  | Forward     |
| E. coli KO11FL uid33875                 | 4874 KB | CP002516  | Reverse     |
| E. coli KO11FL uid62299                 | 4975 KB | CP002970  | Reverse     |
| E. coli K 12 substr DH10B uid20079      | 4642 KB | CP000948  | Forward     |
| E. coli K 12 substr MDS42 uid78215      | 3939 KB | AP012306  | Forward     |
| E. coli K 12 substr MG1655 uid225       | 4958 KB | U00096    | Forward     |
| E. coli K 12 substr W3110 uid16351      | 4603 KB | AP009048  | Forward     |
| E. coli LF82 uid33825                   | 4728 KB | CU651637  | Forward     |
| E. coli LY180 uid203308                 | 4790 KB | CP006584  | Forward     |
| E. coli NA114 uid66975                  | 4925 KB | CP002797  | Forward     |
| E. coli O103 H2 12009 uid32511          | 5398 KB | P010958   | Forward     |
| E. coli O104 H4 2009EL 2050 uid81097    | 5204 KB | CP003297  | Reverse     |
| E. coli O104 H4 2009EL 2071 uid81099    | 5263 KB | CP003301  | Reverse     |
| E. coli O104 H4 2011C 3493 uid81095     | 5224 KB | CP003289  | Reverse     |
| E. coli O111 H 11128 uid32513           | 5321 KB | AP010960  | Forward     |
| E. coli O157H7 EDL933 uid259            | 5477 KB | AE005174  | Forward     |
| E. coli O157H7 uid226                   | 5447 KB | BA000007  | Forward     |
| E. coli O157 H7 EC4115 uid27739         | 5520    | CP001164  | Forward     |
| E. coli O157 H7 TW14359 uid30045        | 5476 KB | CP001368  | Forward     |
| E. coli O26 H11 11368 uid32509          | 5644 KB | AP010953  | Forward     |
| E. coli O55 H7 CB9615 uid42729          | 5336 KB | CP001846  | Forward     |
| E. coli O55 H7 RM12579 uid68245         | 5215 KB | CP003109  | Forward     |
| E. coli O7 K1 CE10 uid63597             | 5264 KB | CP003034  | Forward     |
| E. coli O83 H1 NRG 857C uid41221        | 4703 KB | CP001855  | Forward     |
| E. coli P12b uid59455                   | 4889 KB | CP002291  | Forward     |
| E. coli S88 uid33375                    | 4985 KB | CU928161  | Forward     |
| E. coli SE11 uid18057                   | 4842 KB | AP009240  | Forward     |
| E. coli SE15 uid19053                   | 4673 KB | AP009378  | Forward     |
| E. coli SMS 3 5 uid19469                | 5021 KB | CP000970  | Forward     |
| E. coli UM146 uid50883                  | 4946 KB | CP002167  | Reverse     |
| E. coli UMN026 uid33415                 | 5253 KB | CU928163  | Forward     |
| E. coli UMNK88 uid42137                 | 5138 KB | CP002729  | Forward     |
| E. coli UTI89 uid16259                  | 5018 KB | CP000243  | Forward     |
| E. coli W uid48011                      | 4855 KB | CP002185  | Forward     |
| E. coli W uid62301                      | 4852 KB | CP002967  | Forward     |
| E. coli Xuzhou21 uid45823               | 5336 KB | CP001925  | Forward     |
| E. coli BL21 Gold DE3 pLysS AG uid30681 | 4528 KB | CP001665  | Reverse     |
| E. coli clone D i14 uid52023            | 4991 KB | P002212   | Forward     |
| E. coli clone D i2 uid52021             | 4991 KB | CP002211  | Forward     |
| E. coli c321D uid215084                 | 4600 KB | CP006698  | Forward     |



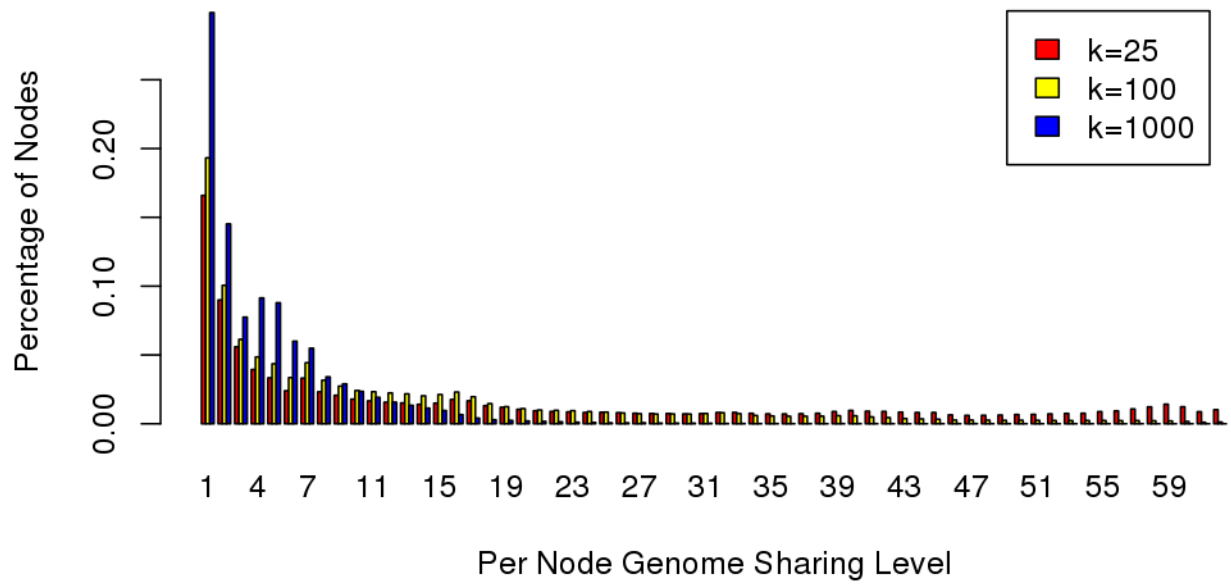

**Fig. 3.** Levels of genome sharing in the nodes of the pan-genome graph of all 62 strains of *E. coli*. The distribution is approximately exponential in shape, although with an extended tail of highly conserved sequences.

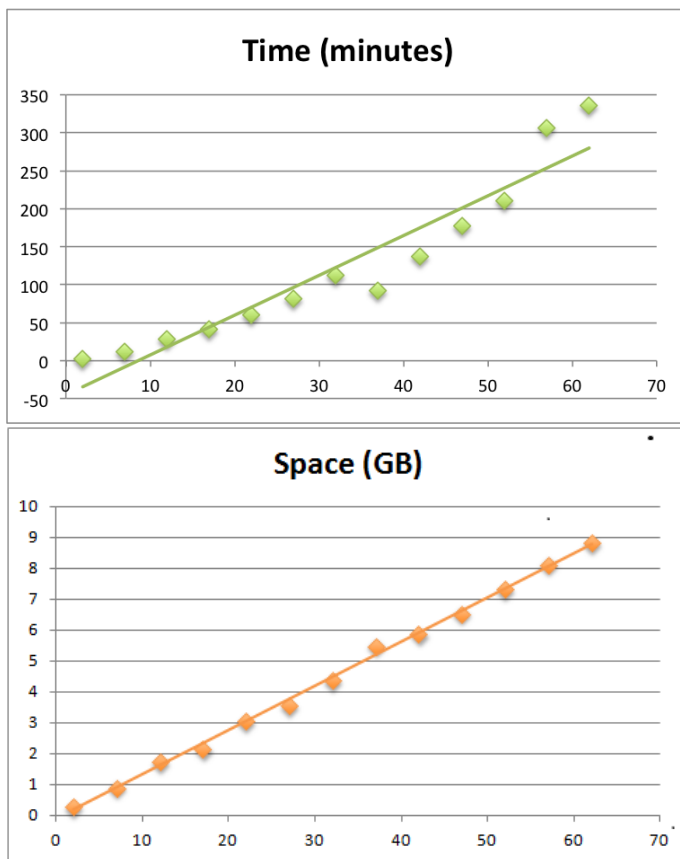

**Fig. 4.** The running time and peak memory of Sibelia (Minkin *et al.*, 2013) on the pan-genome graphs of increasing numbers of *E. coli* strains. Each point represents the minimum value recorded over 5 trials to reduce measurement noise introduced by competing activity of the server. The line represents the linear regression of the points. Following the recommended settings, we used commands of the form `sibelia.py -s loose ecoli.XXXstrains.fa` where `e coli.XXXstrains.fa` was a multifasta file containing the selected XXX genomes.

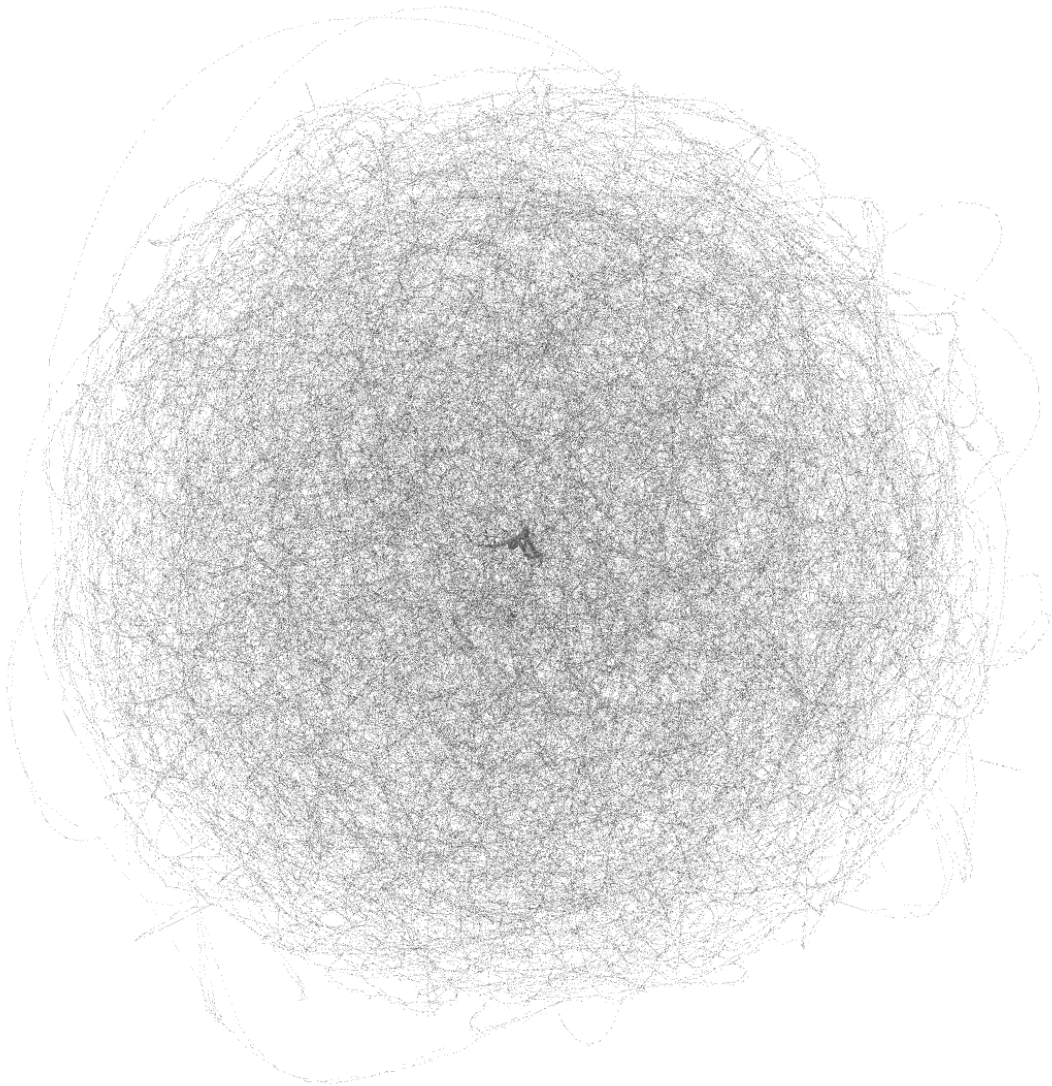

**Fig. 5.** The compressed de Bruijn graph for the *B. anthracis* pan genome with  $k=25$  artistically rendered in Gephi using the ForceAtlas 2 placement algorithm.

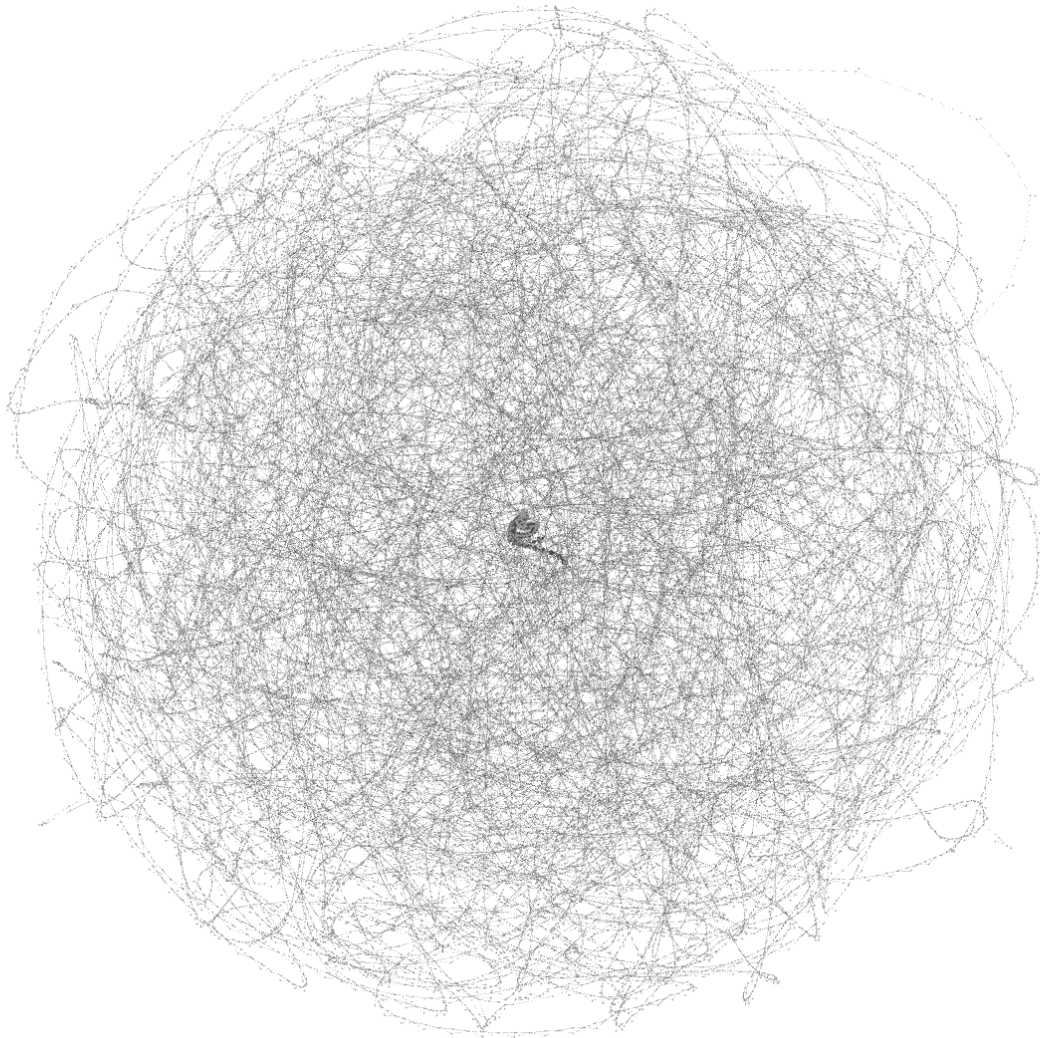

**Fig. 6.** The compressed de Bruijn graph for the *B. anthracis* pan genome with  $k=100$  artistically rendered in Gephi using the ForceAtlas 2 placement algorithm.

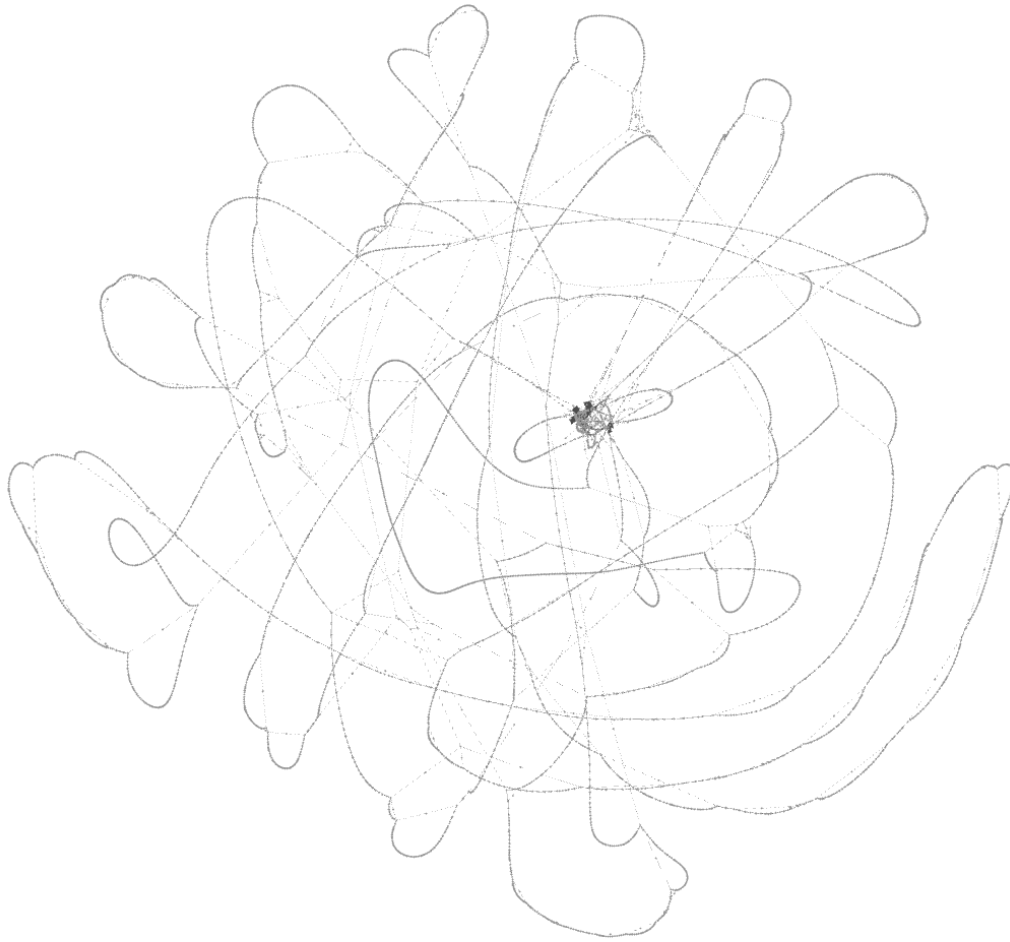

**Fig. 7.** The compressed de Bruijn graph for the *B. anthracis* pan genome with  $k=1000$  artistically rendered in Gephi using the ForceAtlas 2 placement algorithm.

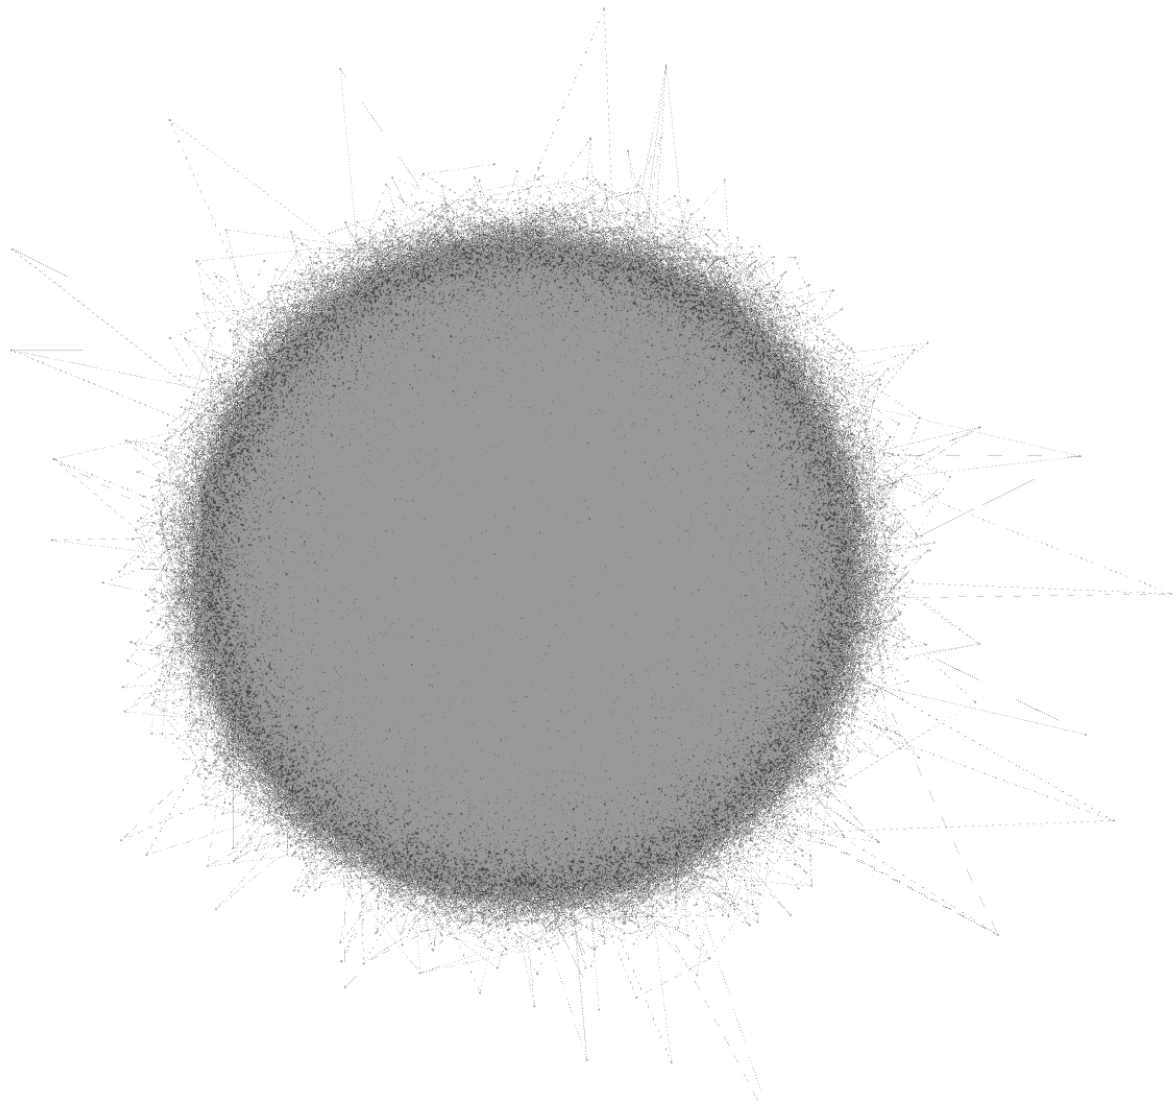

**Fig. 8.** The compressed de Bruijn graph for the E. coli pan genome with  $k=25$  artistically rendered in Gephi using the ForceAtlas 2 placement algorithm.

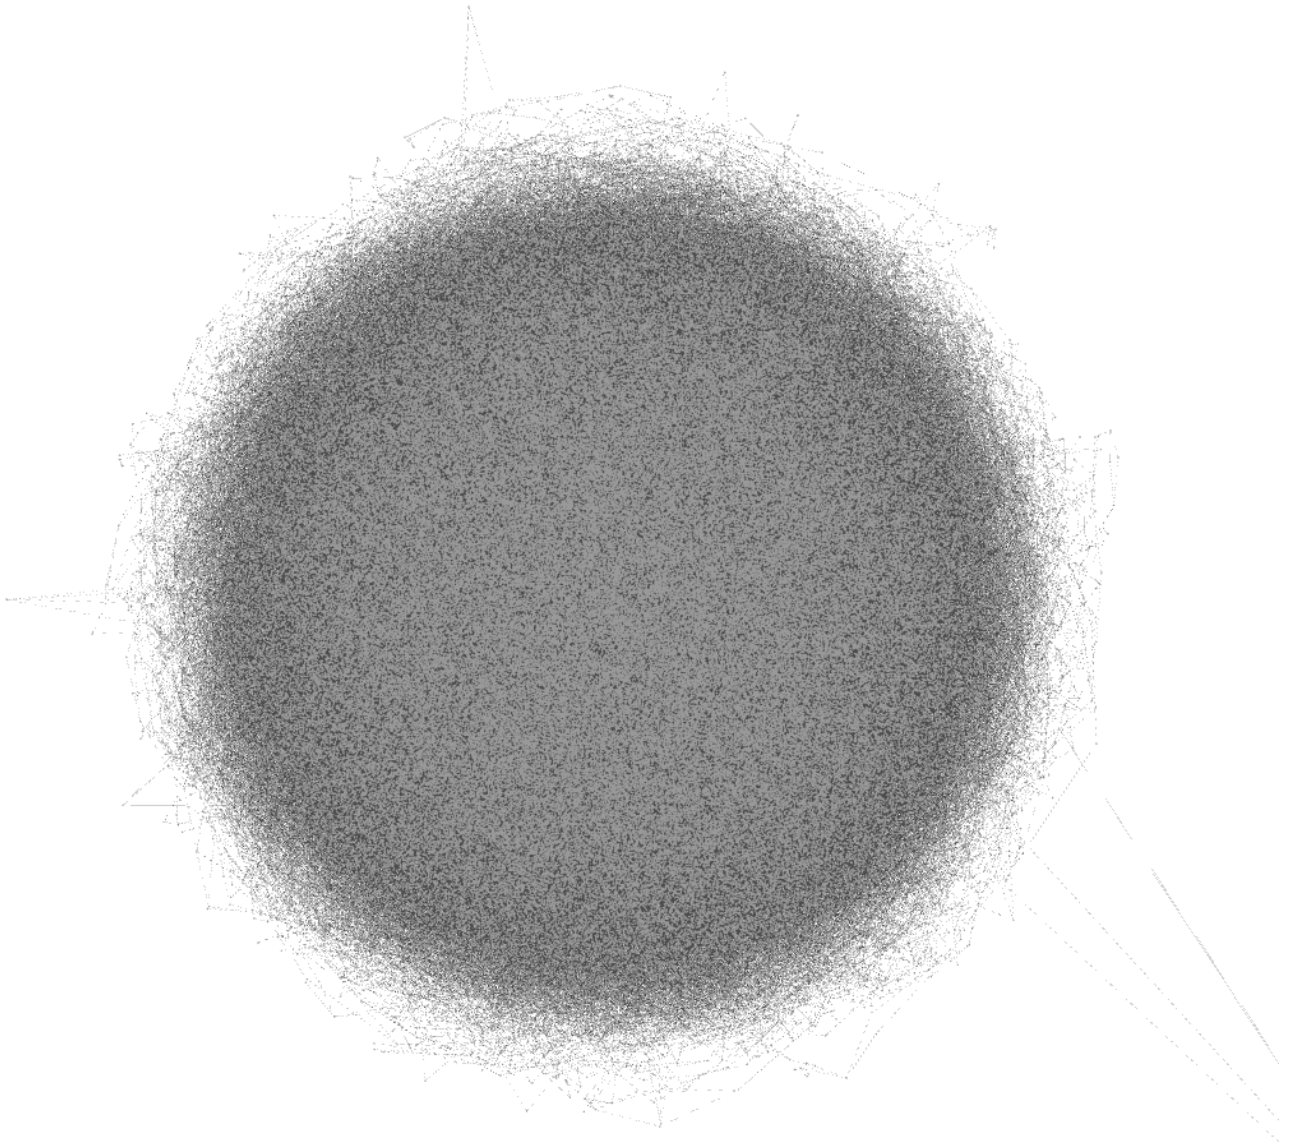

**Fig. 9.** The compressed de Bruijn graph for the *E. coli* pan genome with  $k=100$  artistically rendered in Gephi using the ForceAtlas 2 placement algorithm.

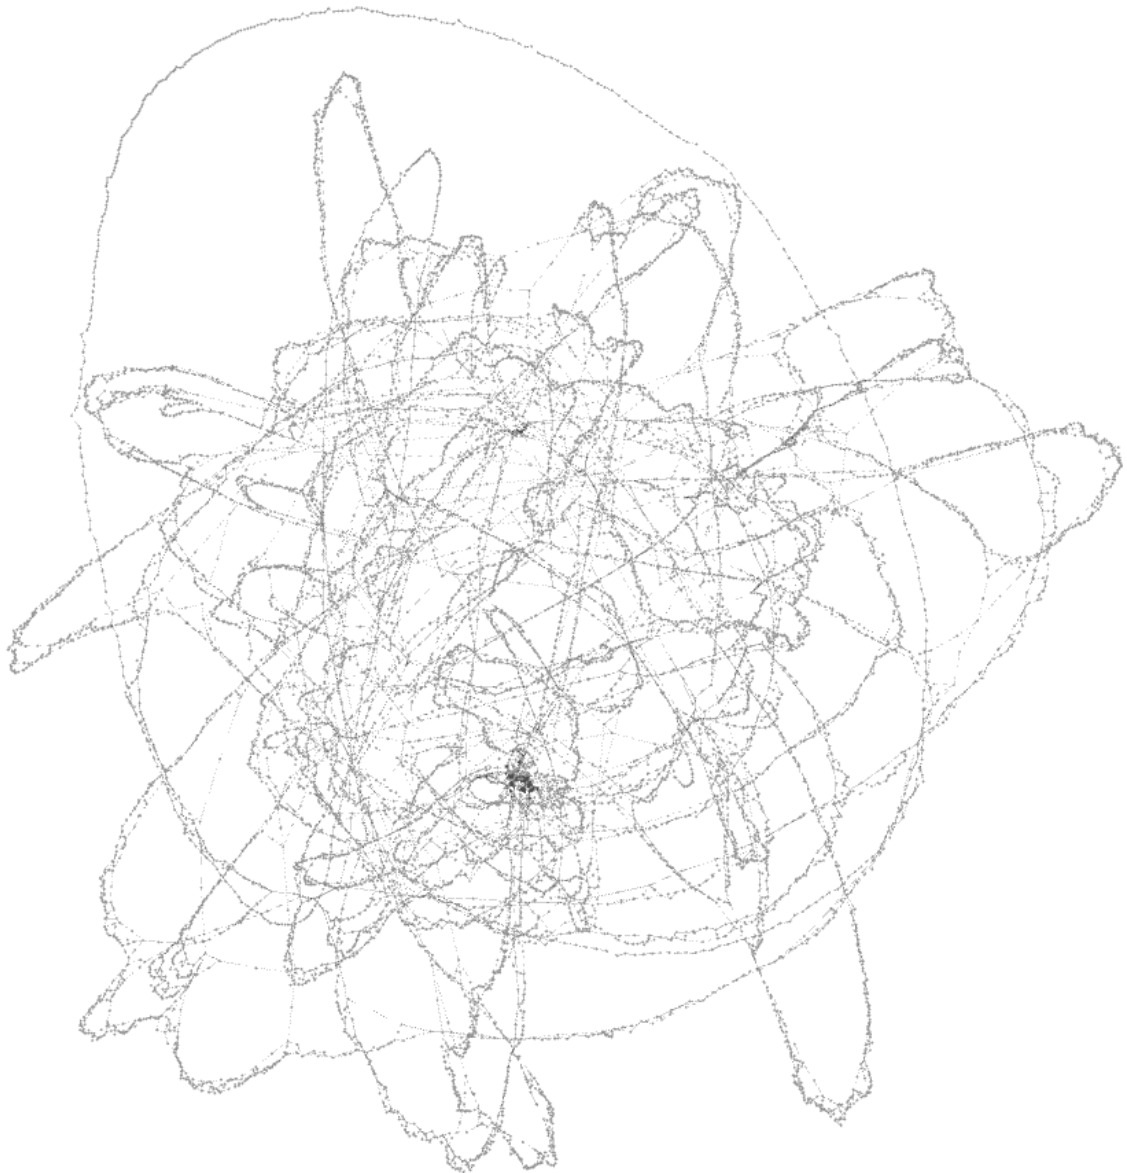

**Fig. 10.** The compressed de Bruijn graph for the *E. coli* pan genome with  $k=1000$  artistically rendered in Gephi using the ForceAtlas 2 placement algorithm.



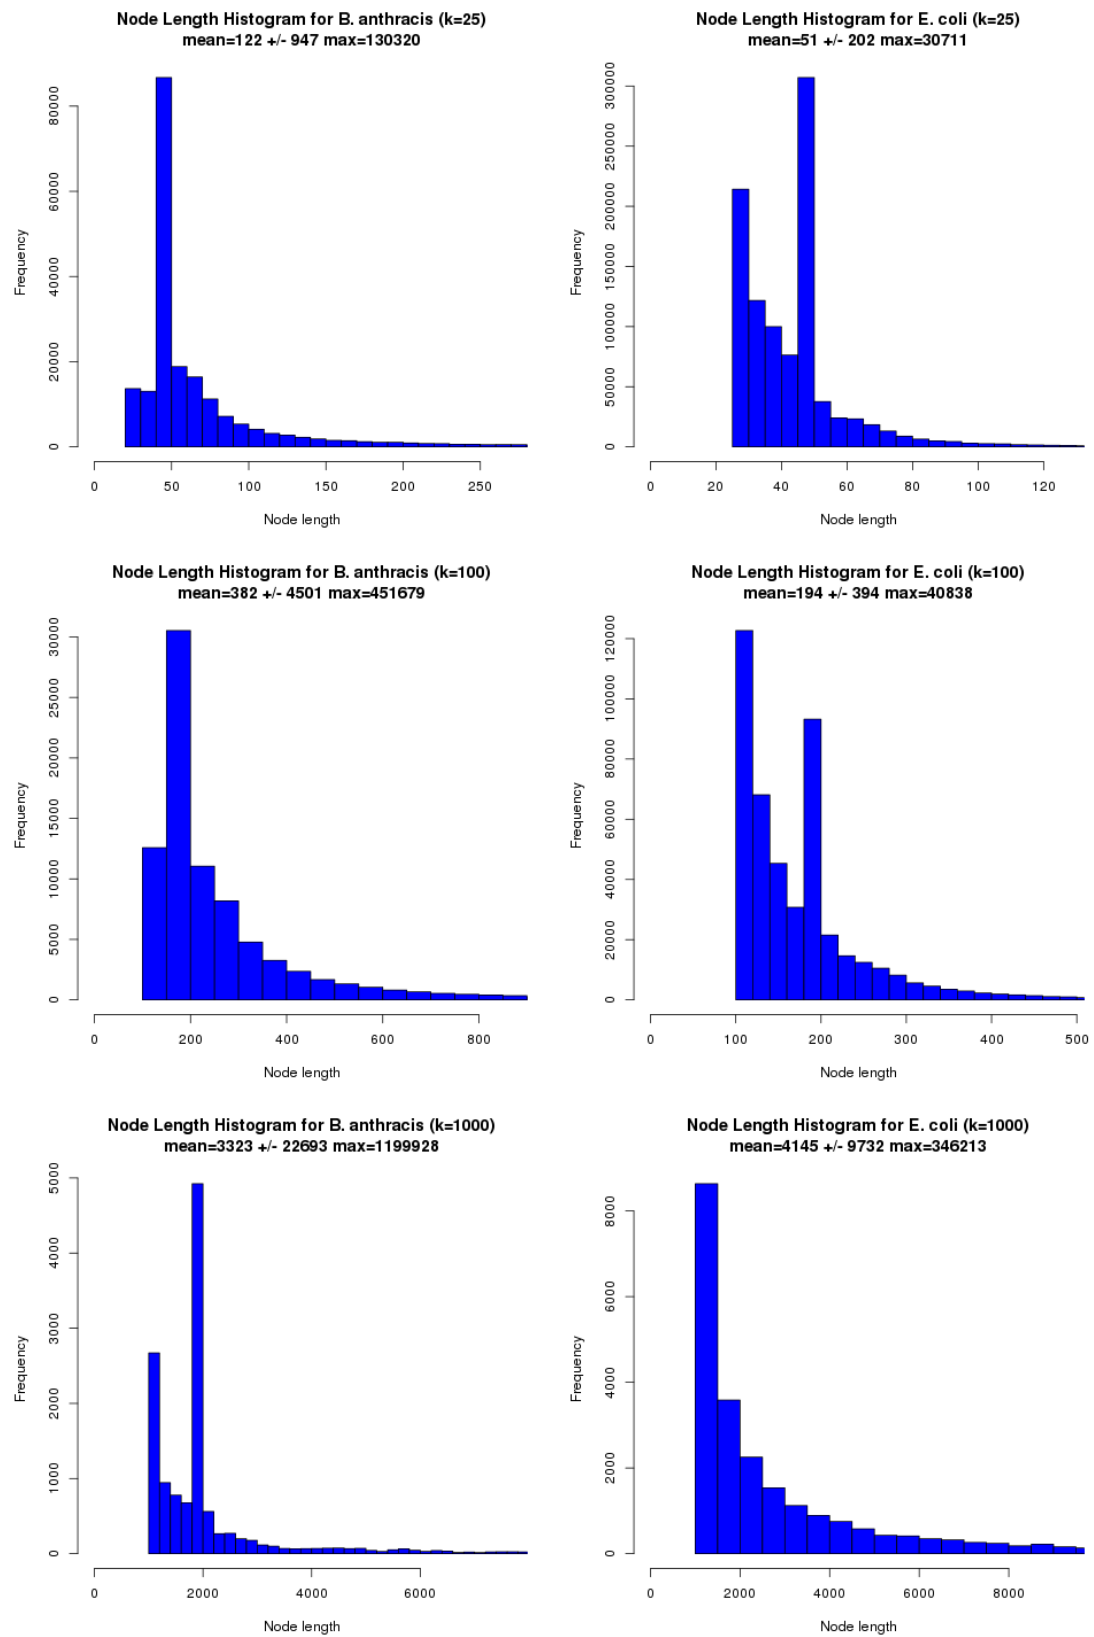

**Fig. 11.** Distributions of node lengths in the compressed de Bruijn graphs for the pan-genomes of 9 strains of *E. coli* and 9 strains of *B. anthracis*.

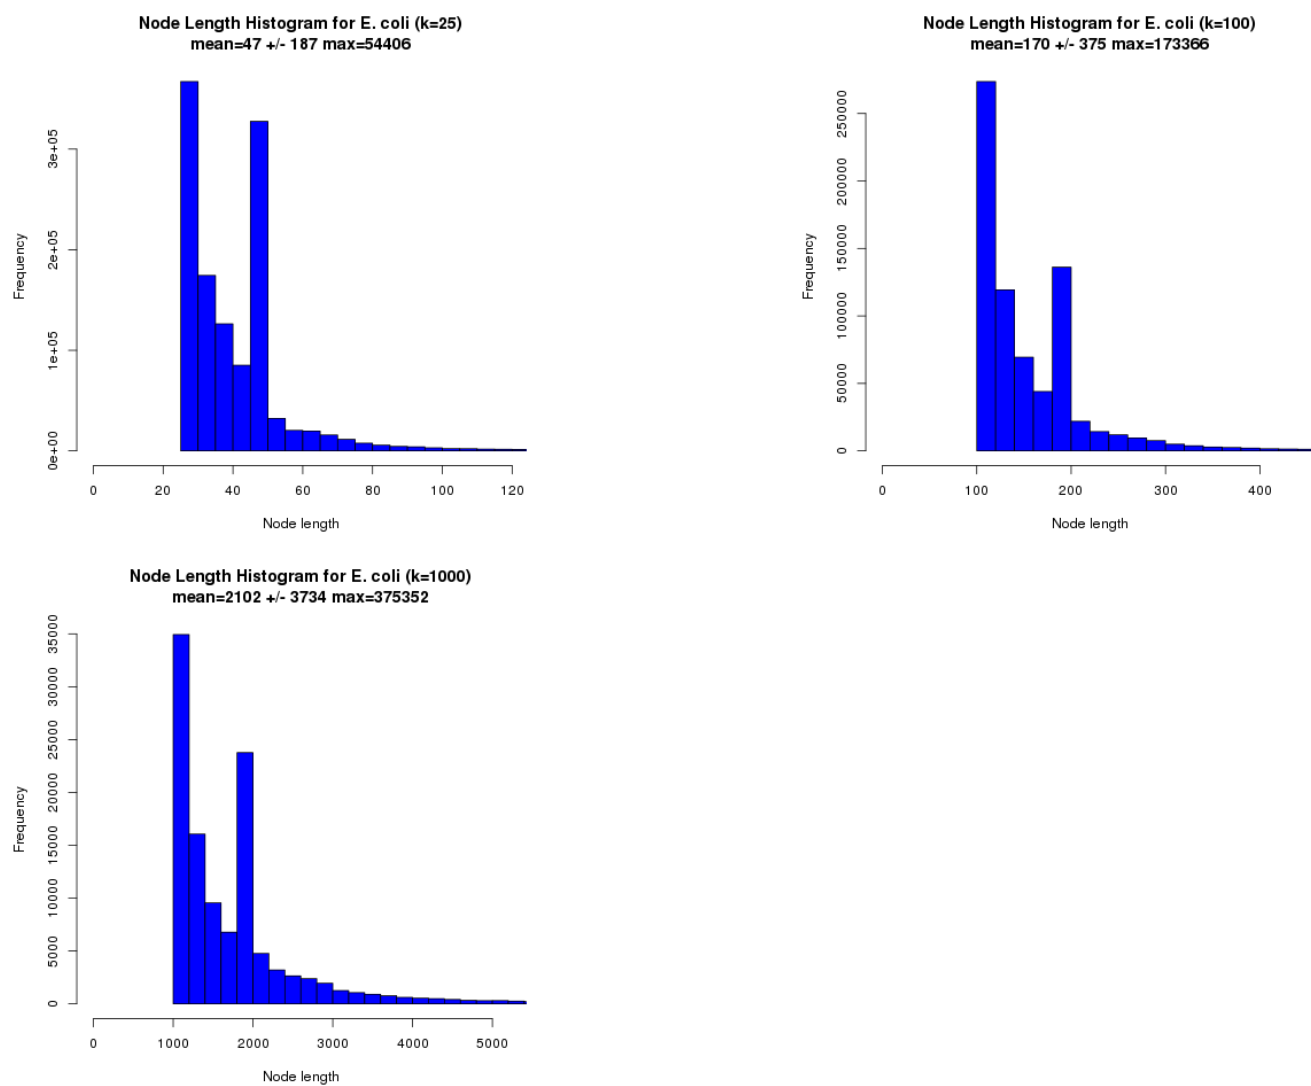

Fig. 12. Distributions of node lengths in the compressed de Bruijn graphs for the pan-genomes of all 62 strains of *E. coli*.

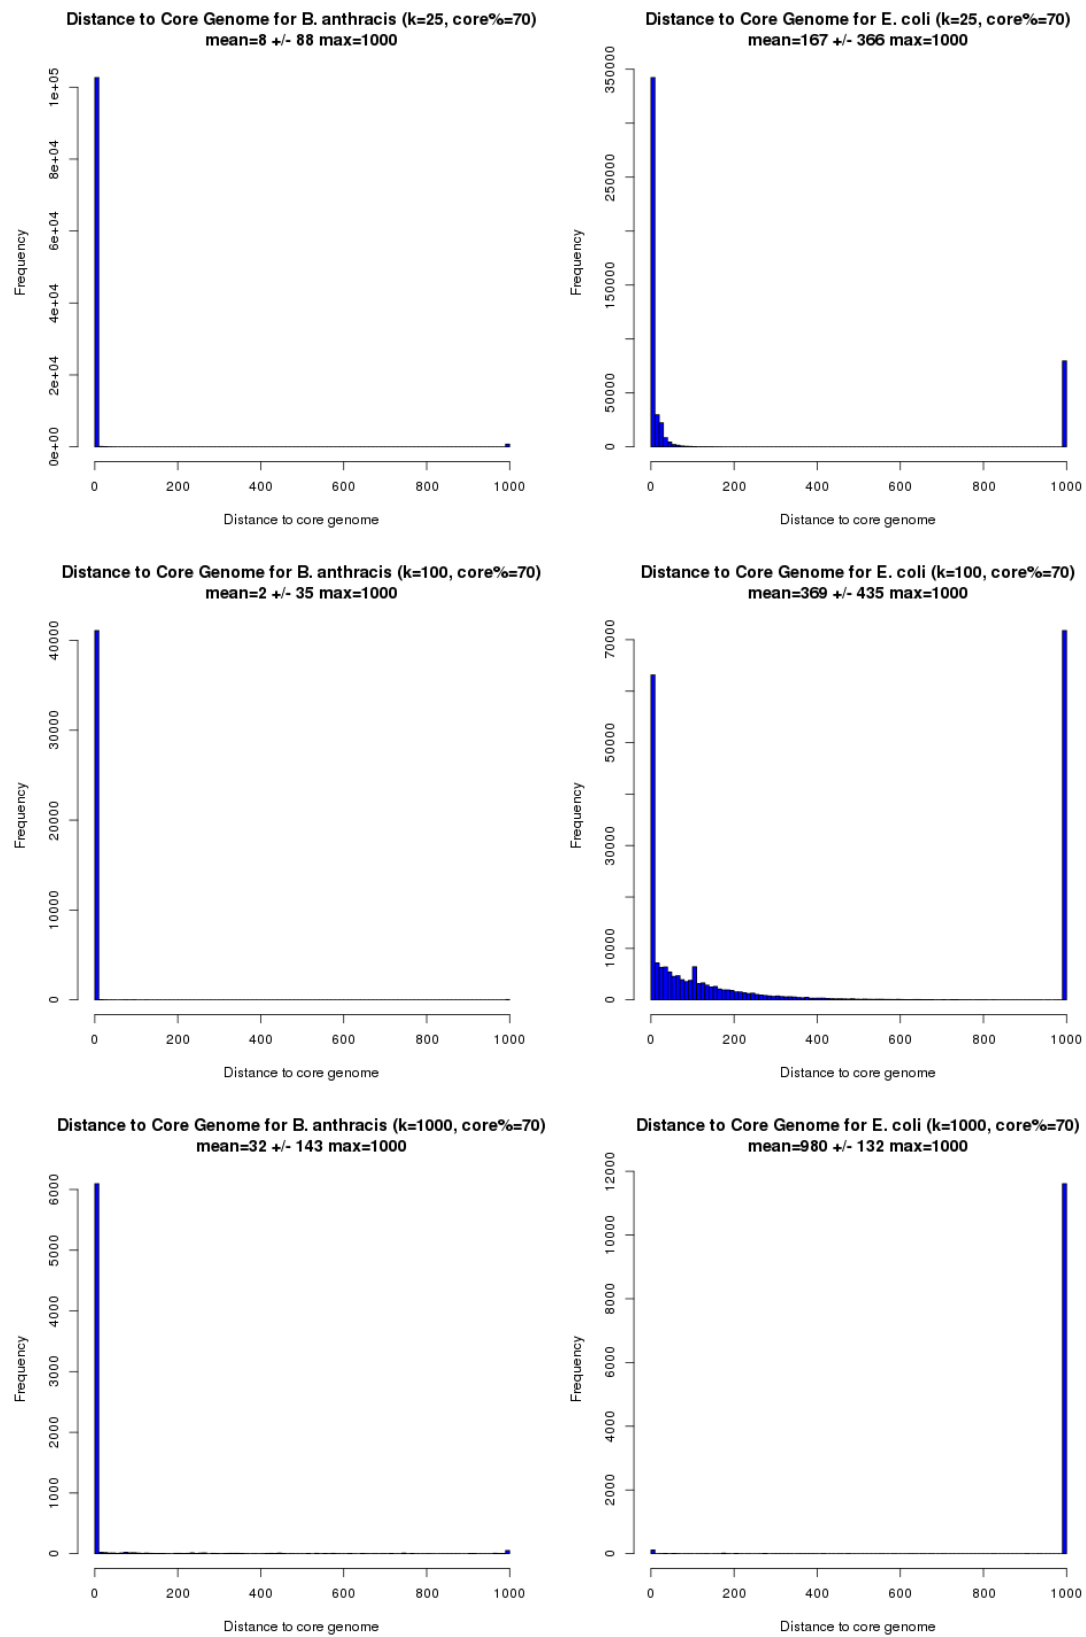

**Fig. 13.** Distributions of distances to the core genome in the compressed de Bruijn graphs for the pan-genomes of 9 strains of *E. coli* and 9 strains of *B. anthracis*.
